# Supplementary material for: Bacterial Tradeoffs in Growth Rate and Extracellular Enzymes
Source: PubMed Central journal article supplement (PMC6933949; doi:10.3389/fmicb.2019.02956), 2019-12-20
Supplement: Image_1.pdf [file Image_1.pdf]

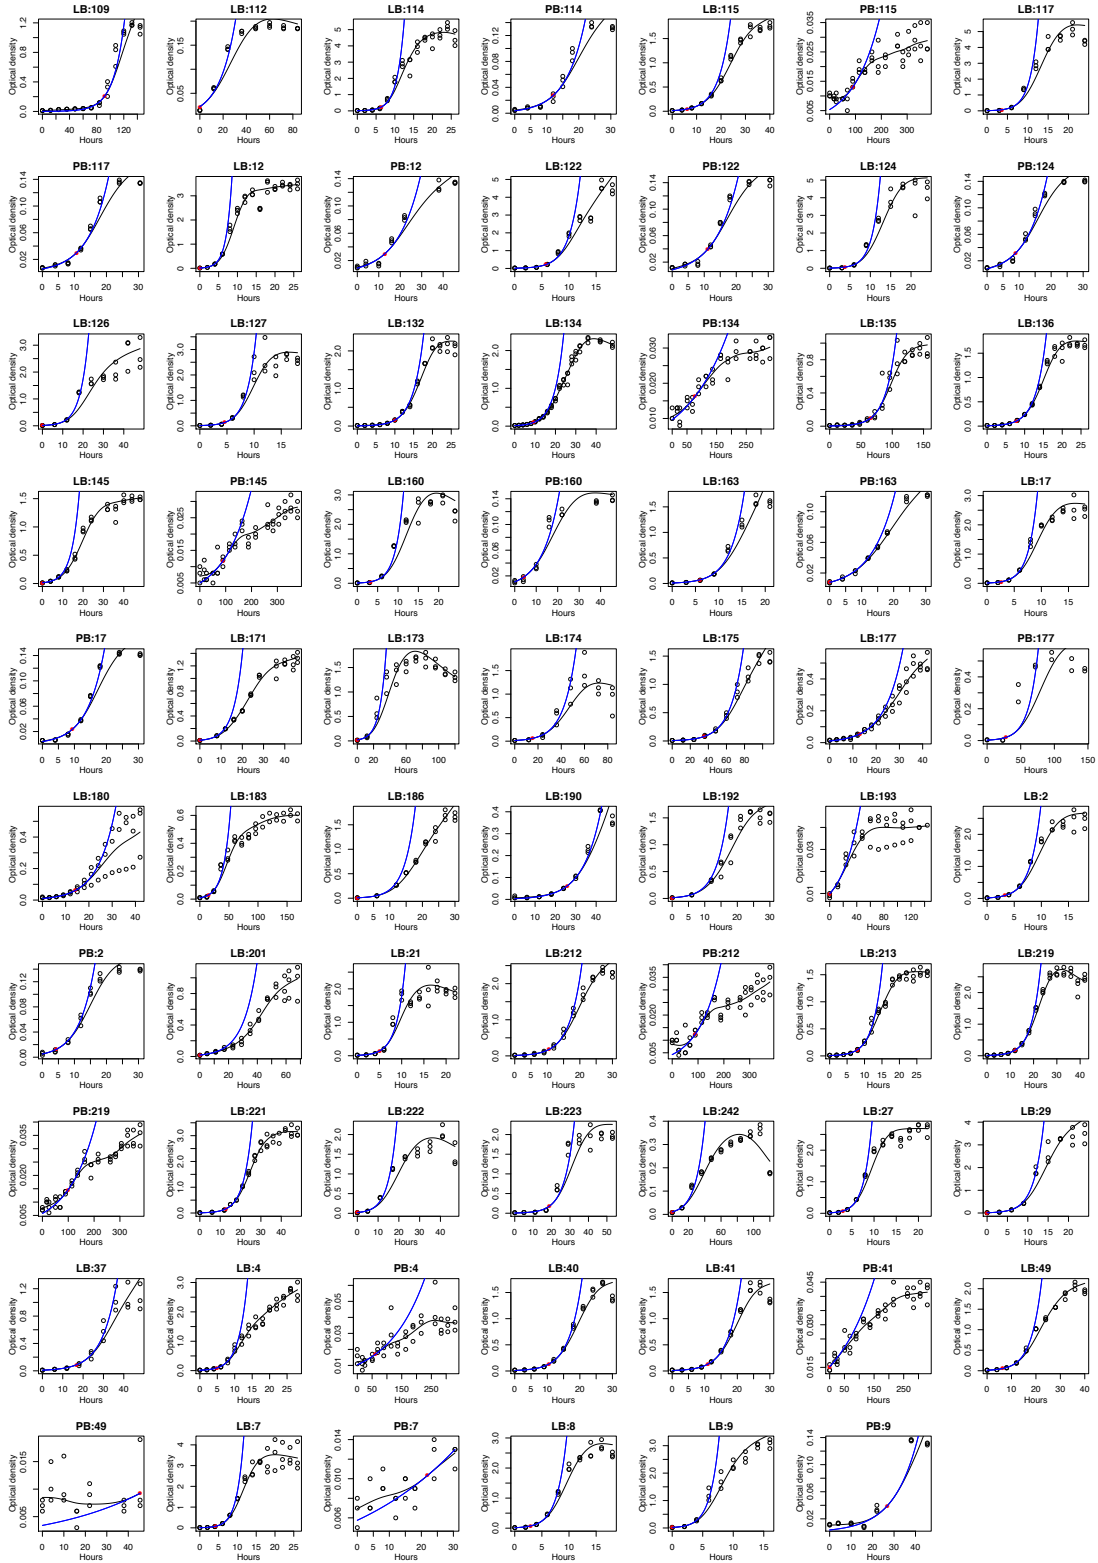

**Supplementary Figure 1.** Growth curves for bacterial strains on Luria broth (LB) or plant litter broth (PB). Strain numbers are shown over each panel. Black curves show the spline fit from the ‘growthrates’ R package; blue curves are the exponential functions used to derive growth rates.
